# Supplementary material
Source: PubMed Central journal article supplement (PMC1189308)

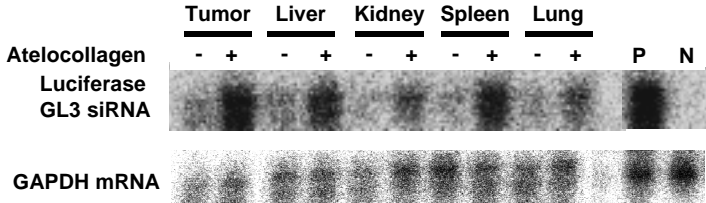

Supplement: pnas_0501753102_1.pdf [file pnas_0501753102_1.pdf]
